# Supplementary material for: In Silico Prospecting for Novel Bioactive Peptides from Seafoods: A Case Study on Pacific Oyster (Crassostrea gigas)
Source: MDPI journal article supplement (doi:10.3390/molecules28020651), 2023-01-09
Supplement: s1 [file s1]

***In Silico* Prospecting for Novel Bioactive Peptides from Seafood: A Case Study on Pacific Oysters (*Crassostrea gigas*)**

Leyi Zhou<sup>1</sup>, Rufa L. Mendez<sup>1</sup> and Jung Y. Kwon<sup>1,2</sup>

<sup>1</sup>Department of Food Science and Technology, College of Agricultural Sciences, Oregon State University, Corvallis, OR 97331, USA;

<sup>2</sup>Seafood Research and Education Center, Oregon State University, Astoria, OR 97103, USA

Address correspondence to JYK (Email: [Jung.Kwon@oregonstate.edu](mailto:Jung.Kwon@oregonstate.edu))

**Supplementary Table S1.** Allergenic motifs previously reported in *Crassostrea gigas* Tropomyosin *Cra g 1*.

| <i>Cra g 1</i> Motifs                                  | Position  | Citation                |
|--------------------------------------------------------|-----------|-------------------------|
| TSLQKK                                                 | 44-49     | (Fang et al., 2019)     |
| TKLEEAECTASEAQET                                       | 69-85     | (Fang et al., 2019)     |
| MERSEERLQT                                             | 99-108    | (Fang et al., 2019)     |
| NNASEERTDVL                                            | 134-144   | (Fang et al., 2019)     |
| VQNDQASQREDSYEET                                       | 209-224   | (Fang et al., 2019)     |
| IQLLEEDMERSEER                                         | 92-105    | (Ishikawa et al., 1998) |
| DEERMDALENQLKEARMLAEEADRKYDEVARKLAMVE<br>ADLERAEERAESG |           | (Marti et al., 2007)    |
| IQLLEEDMERSEER                                         | [41-54]   | BIOPEP                  |
| LAITEVDLERAEARLEAAEAK                                  | [118-138] | BIOPEP                  |
| SLEISEQEASQREDSYEETIRDLTQRLK                           | [155-182] | BIOPEP                  |
| LQKEVDRLEDEL                                           | [198-209] | BIOPEP                  |
| KEVDRLEDE                                              | [200-208] | BIOPEP                  |
| AISDELDQTFAEL                                          | [218-230] | BIOPEP                  |
| AISDELDQTFAELAGY                                       | [218-233] | BIOPEP                  |

|                           |          |        |
|---------------------------|----------|--------|
| NRKVLENLNNASEERTDVLEKQL   | [75-97]  | BIOPEP |
| ENLNNASEERTDVLEKQLTEAKLIA | [80-104] | BIOPEP |

**Table S2.** Absorption parameters and physico-chemical properties of positively scored bioactive peptide candidates retrieved from ADMETlab2.0 and ProtParam.

| Peptide Sequence | Source Protein Accession #                                                                  | Caco-2 Permeability (log scale) | HIA | F20% | F30% | Hydrophobicity | Hydropathicity | Hydrophilicity | Charge | Mol wt  |
|------------------|---------------------------------------------------------------------------------------------|---------------------------------|-----|------|------|----------------|----------------|----------------|--------|---------|
| EQTQP            | Myosin Heavy Chain, Striated Muscle                                                         | -6.5                            | +++ | ++   | +++  | -0.45          | -2.56          | 0.6            | -1     | 601.68  |
| YPPVHDNN         | Ribonuclease Oy (RNase Oy) (EC 3.1.27.-)                                                    | -6.975                          | +   | +++  | +++  | -0.25          | -1.75          | -0.11          | -0.5   | 955.1   |
| VAPEEHPV L       | Actin                                                                                       | -6.974                          | +++ | --   | +++  | 0.01           | 0.07           | 0.02           | -1.5   | 990.25  |
| NSPAM            | Actin                                                                                       | -6.976                          | --  | ++   | +++  | -0.09          | -0.44          | -0.26          | 0      | 518.64  |
| SVPVL            | Stimulator of interferon genes protein (TIR-STING) (Probable NAD(+) hydrolase) (EC 3.2.2.6) | -6.608                          | ++  | ---  | ---  | 0.26           | 1.96           | -0.9           | 0      | 513.7   |
| CEPVY            | Interleukin 17-like protein (CgIL-17)                                                       | -6.951                          | +   | +++  | +++  | -0.02          | 0.06           | -0.36          | -1     | 609.75  |
| QQQIK            | Myosin Heavy Chain, Striated Muscle                                                         | -6.199                          | +   | +++  | +++  | -0.49          | -1.98          | 0.36           | 1      | 643.82  |
| EVSETTCPR        | Ribonuclease Oy (RNase Oy) (EC 3.1.27.-)                                                    | -7.594                          | +++ | +++  | +++  | -0.35          | -0.96          | 0.67           | -1     | 1021.22 |
| PQSCR            | Stimulator of interferon genes protein (TIR-STING) (Probable NAD(+) hydrolase) (EC 3.2.2.6) | -7.169                          | +++ | +++  | +++  | -0.55          | -1.58          | 0.5            | 1      | 589.72  |
| AQQQK            | Myosin Regulatory Light Chain B, Smooth Adductor Muscle Isoform X1                          | -6.545                          | --  | +++  | +++  | -0.58          | -2.52          | 0.62           | 1      | 601.73  |
| GPSSNPNF         | Myosin Heavy Chain, Striated Muscle                                                         | -7.209                          | ++  | +++  | +++  | -0.15          | -1.17          | -0.19          | 0      | 818.94  |
| STHPH            | Myosin Heavy Chain, Striated Muscle                                                         | -6.206                          | --- | --   | +++  | -0.26          | -1.9           | -0.22          | 1      | 577.66  |
| CTCTDCNG K       | Defensin Cg-Defm (Cg-Def) (Mantle defensin)                                                 | -8.017                          | ++  | +++  | +++  | -0.28          | -0.58          | 0.27           | 0      | 944.17  |

## Supplementary Information

|          |                                                                                             |        |     |     |     |       |       |       |    |        |
|----------|---------------------------------------------------------------------------------------------|--------|-----|-----|-----|-------|-------|-------|----|--------|
| QACID    | Myosin Heavy Chain, Striated Muscle                                                         | -7.309 | +   | +++ | +++ | -0.08 | 0.36  | -0.02 | -1 | 548.67 |
| QEGCTCVR | Interleukin 17-like protein (CgIL-17)                                                       | -7.238 | ++  | +++ | +++ | -0.31 | -0.43 | 0.29  | 0  | 895.12 |
| ICNEIK   | Stimulator of interferon genes protein (TIR-STING) (Probable NAD(+) hydrolase) (EC 3.2.2.6) | -7.488 | +++ | +++ | +++ | -0.14 | 0.1   | 0.27  | 0  | 718.95 |
| CIIPNE   | Myosin Heavy Chain, Striated Muscle                                                         | -7.263 | +++ | +++ | +++ | 0.03  | 0.48  | -0.23 | -1 | 687.89 |
| EESESASN | Paramyosin Isoform X2                                                                       | -7.951 | +++ | +++ | +++ | -0.41 | -2.01 | 1.4   | -4 | 981    |
| EEASGM   | Paramyosin Isoform X2                                                                       | -7.325 | ++  | +++ | +++ | -0.14 | -0.75 | 0.75  | -2 | 622.72 |
| ETAANM   | Paramyosin Isoform X2                                                                       | -7.396 | ++  | ++  | +++ | -0.11 | -0.37 | 0.08  | -1 | 635.76 |
| DKDGK    | Myosin Regulatory Light Chain B, Smooth Adductor Muscle Isoform X1                          | -7.646 | +++ | +++ | +++ | -0.7  | -3.04 | 2.4   | 0  | 561.65 |
| SVVANNIK | Tropomyosin (Allergen Cra g 1.03) (allergen Cra g 1) (Fragment)                             | -7.236 | +   | +++ | +++ | -0.48 | -1.98 | 0.92  | 0  | 616.74 |
| CSGCVP   | Interleukin 17-like protein (CgIL-17)                                                       | -7.587 | +++ | +++ | +++ | -0.2  | -0.8  | 0.63  | -2 | 753.86 |
| CQSIGCR  | Hemocyte defensin Cg-Defh1 (Fragment)                                                       | -6.5   | +++ | ++  | +++ | -0.45 | -2.56 | 0.6   | -1 | 601.68 |

Notes: Optimal Caco-2 permeability > -5.15 log; (+) indicates Human Intestinal Absorption <30%, bioavailability <20% or <30% respectively. Color coding from red, yellow to green indicates increasing absorption rate and bioavailability.
